# Supplementary material for: Impaired Tight Junctions in Atopic Dermatitis Skin and in a Skin-Equivalent Model Treated with Interleukin-17
Source: PubMed Central journal article supplement (PMC5010286; doi:10.1371/journal.pone.0161759), 2016-09-02

**S1 Table The details of recruited subjects**

| Subject No. | race      | sex    | age | Biopsied sites                                                                       |
|-------------|-----------|--------|-----|--------------------------------------------------------------------------------------|
| 001         | Caucasian | Male   | 49  | Posterior region of arm                                                              |
| 002         | Caucasian | Female | 29  | Posterior region of arm                                                              |
| 003         | Caucasian | Female | 48  | Posterior region of arm                                                              |
| 004         | Caucasian | Male   | 59  | NLS, anterior region of arm; LS, leg                                                 |
| 005         | Caucasian | Female | 61  | NLS, anterior region of arm; LS, leg                                                 |
| 006         | Caucasian | Female | 49  | NLS, posterior region of arm/shoulder part<br>LS, posterior region of arm/elbow part |

Healthy subjects

AD patients

Healthy subjects

AD patients

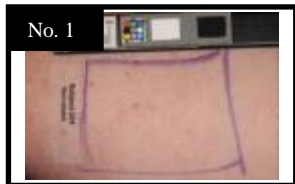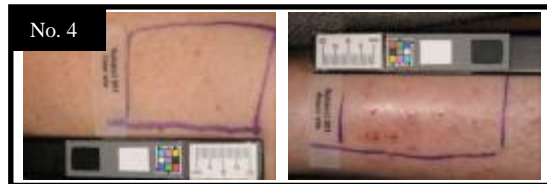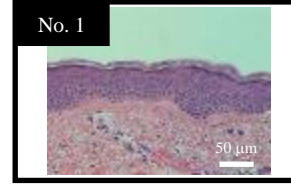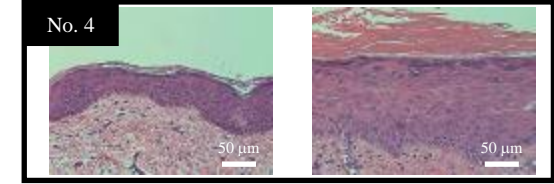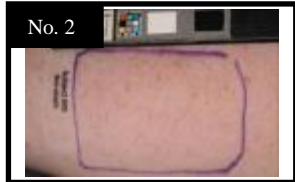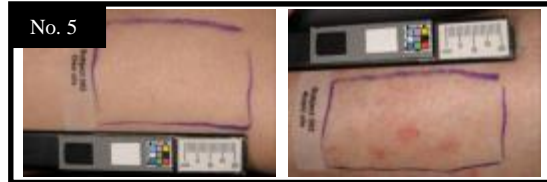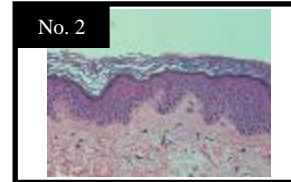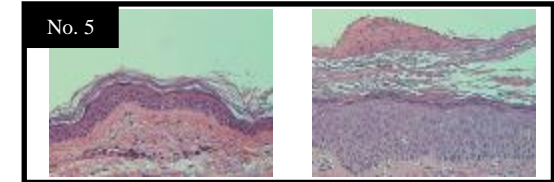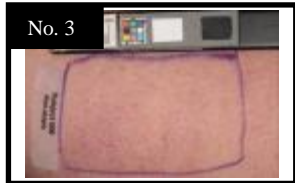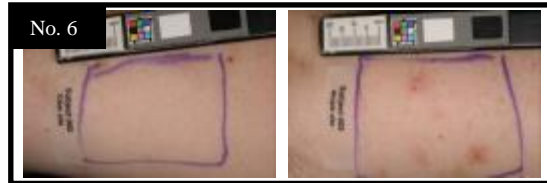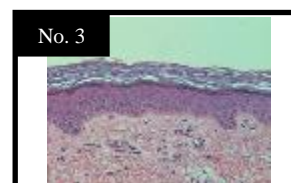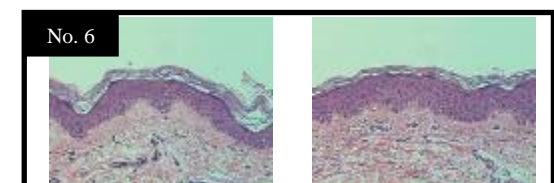

Supplement: pone.0161759.s003.pdf [file pone.0161759.s003.pdf]
