# Supplementary material for: Impaired Tight Junctions in Atopic Dermatitis Skin and in a Skin-Equivalent Model Treated with Interleukin-17
Source: PubMed Central journal article supplement (PMC5010286; doi:10.1371/journal.pone.0161759), 2016-09-02

**S2 Fig. Western blotting for filaggrin in the skin equivalent model treated with IL-4, TNF $\alpha$ , IL-17 and IL-22, respectively.**

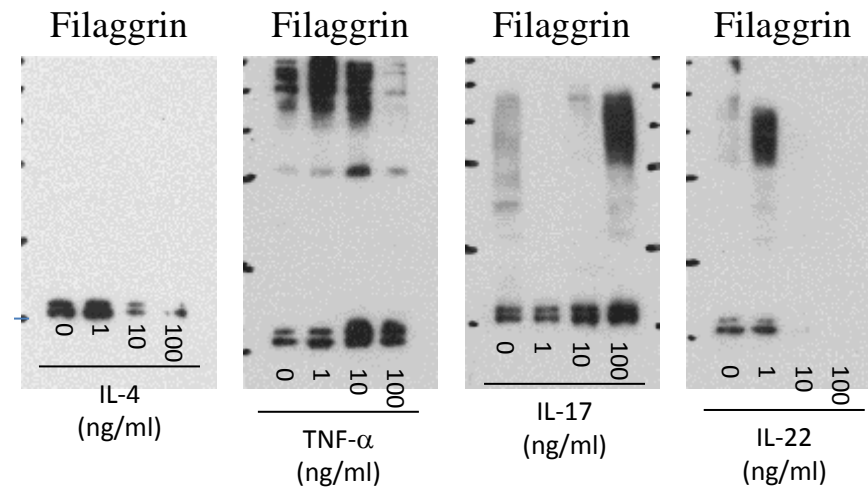

Supplement: pone.0161759.s002.pdf [file pone.0161759.s002.pdf]
