# Supplementary material for: Impaired Tight Junctions in Atopic Dermatitis Skin and in a Skin-Equivalent Model Treated with Interleukin-17
Source: PubMed Central journal article supplement (PMC5010286; doi:10.1371/journal.pone.0161759), 2016-09-02
Supplement: pone.0161759.s004.pdf [file pone.0161759.s004.pdf]

**S2 Table The details of numeric data**

| cytokine                     | Fig.2a        |      |       |       | Fig.5a                              | Fig.5c                        |
|------------------------------|---------------|------|-------|-------|-------------------------------------|-------------------------------|
|                              | TNF- $\alpha$ | IL-4 | IL-17 | IL-22 | profilaggrin/GAPDH (Arbitrary Unit) | Amino Acid (nmol/ $\phi$ 8mm) |
| Number of samples            | 6             | 6    | 6     | 6     | 3                                   | 4                             |
| 0 ng/ml                      | 1165          | 1066 | 1117  | 995   | 1.0                                 | 95.1                          |
|                              | 808           | 1010 | 1167  | 910   | 1.0                                 | 111.6                         |
|                              | 1099          | 866  | 1088  | 907   | 1.0                                 | 100.6                         |
|                              | 1149          | 1052 | 1126  | 993   | -                                   | 105.2                         |
|                              | 801           | 980  | 1197  | 909   | -                                   | -                             |
|                              | 1097          | 829  | 1131  | 909   | -                                   | -                             |
| AV                           | 1020          | 967  | 1138  | 937   | 1.0                                 | 103.1                         |
| STDEVP                       | 154           | 90   | 35    | 40    | 0.0                                 | 6.1                           |
| 1 ng/ml                      | 993           | 932  | 1016  | 1014  | 1.2                                 | 113.3                         |
|                              | 1033          | 988  | 813   | 932   | 1.1                                 | 99.2                          |
|                              | 1058          | 998  | 972   | 971   | 0.9                                 | 101.2                         |
|                              | 987           | 937  | 1040  | 1032  | -                                   | 105.5                         |
|                              | 1051          | 995  | 840   | 935   | -                                   | -                             |
|                              | 1083          | 1015 | 1004  | 972   | -                                   | -                             |
| AV                           | 1034          | 978  | 948   | 976   | 1.1                                 | 104.8                         |
| STDEVP                       | 35            | 32   | 89    | 37    | 0.1                                 | 5.4                           |
| p value (t-test, vs 0 ng/ml) | 0.84          | 0.81 | 0.00  | 0.14  | 0.42                                | 0.73                          |
| 10 ng/ml                     | 751           | 1057 | 871   | 1101  | 1.0                                 | 77.9                          |
|                              | 1141          | 991  | 925   | 1002  | 0.9                                 | 102.8                         |
|                              | 1088          | 931  | 902   | 1071  | 0.8                                 | 103.0                         |
|                              | 761           | 1059 | 895   | 1102  | -                                   | 93.4                          |
|                              | 1150          | 1005 | 944   | 1003  | -                                   | -                             |
|                              | 1105          | 942  | 920   | 1075  | -                                   | -                             |
| AV                           | 999           | 997  | 910   | 1059  | 0.9                                 | 94.3                          |
| STDEVP                       | 173           | 50   | 24    | 42    | 0.1                                 | 10.2                          |
| p value (t-test, vs 0 ng/ml) | 0.85          | 0.52 | 0.00  | 0.00  | 0.11                                | 0.24                          |
| 100 ng/ml                    | 1135          | 862  | 903   | 988   | 0.9                                 | 99.0                          |
|                              | 905           | 1016 | 999   | 1131  | 0.9                                 | 77.1                          |
|                              | 1012          | 868  | 903   | 998   | 0.7                                 | 81.4                          |
|                              | 1139          | 856  | 942   | 987   | -                                   | 79.4                          |
|                              | 924           | 1028 | 1027  | 1126  | -                                   | -                             |
|                              | 1037          | 884  | 943   | 1001  | -                                   | -                             |
| AV                           | 1025          | 919  | 953   | 1038  | 0.8                                 | 84.2                          |
| STDEVP                       | 91            | 74   | 46    | 64    | 0.1                                 | 8.7                           |
| p value (t-test, vs 0 ng/ml) | 0.95          | 0.37 | 0.00  | 0.01  | 0.09                                | 0.02                          |
